# Supplementary material for: Competitive biosorption of Cr(vi) and Zn(ii) ions in single- and binary-metal systems onto a biodiesel waste residue using batch and fixed-bed column studies
Source: Royal Society of Chemistry journal article supplement (doi:10.1039/c5ra05962c), 2015-01-01
Supplement: c5ra05962c1.pdf [file c5ra05962c1.pdf]

## **Competitive biosorption of Cr(VI) and Zn(II) ions in single- and binary-metal systems onto a biodiesel waste residue using batch and fixed-bed column studies**

Shanmugaprakash M<sup>1</sup>, Sivakumar V<sup>2\*</sup>

<sup>1</sup>*Downstream Processing Laboratory, Department of Biotechnology, Kumaraguru College of Technology, Coimbatore 641 049, India.*

<sup>2</sup>*Department of Chemical Engineering, A.C. Tech, Anna University, Chennai-600 025, India.*

\*Corresponding author. Tel.: 0422-266 1100; Fax: 0422-266 9406.

*E-mail address:* sunbioin@gmail.com

Figure S1 FTIR spectra of (a) Raw, (b)Cr(VI)-loaded, (c) Zn(II)-loaded and (d) Cr(VI)+ Zn(II)-loaded DPOC.

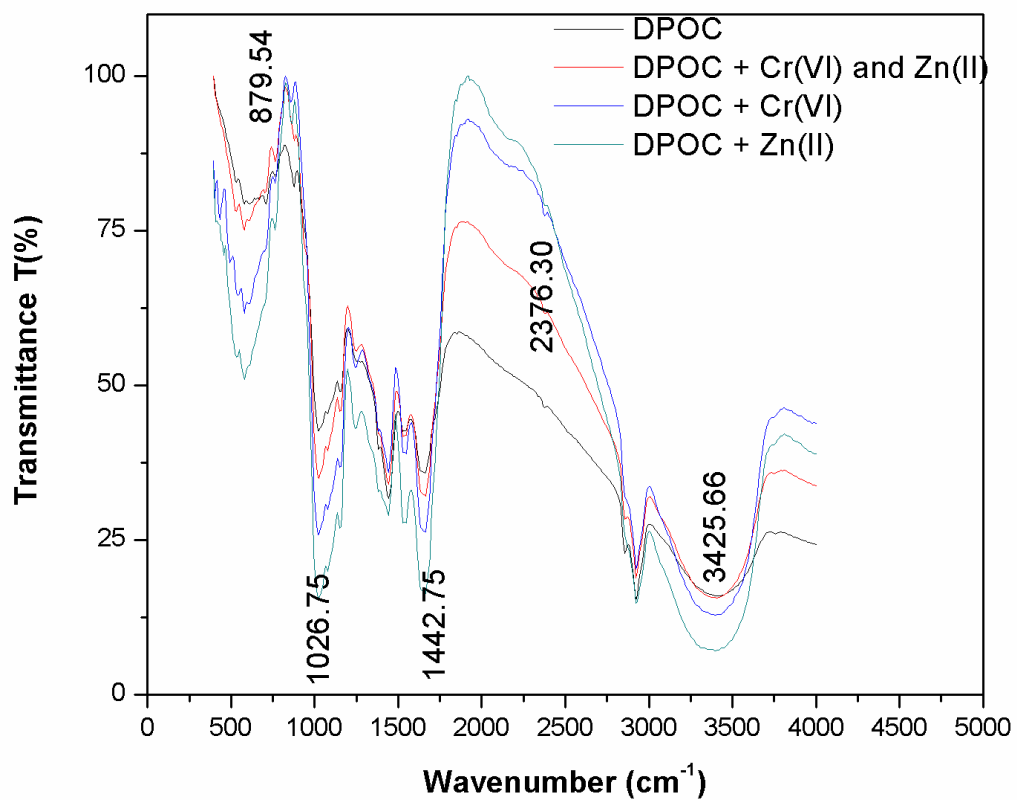

Figure S2

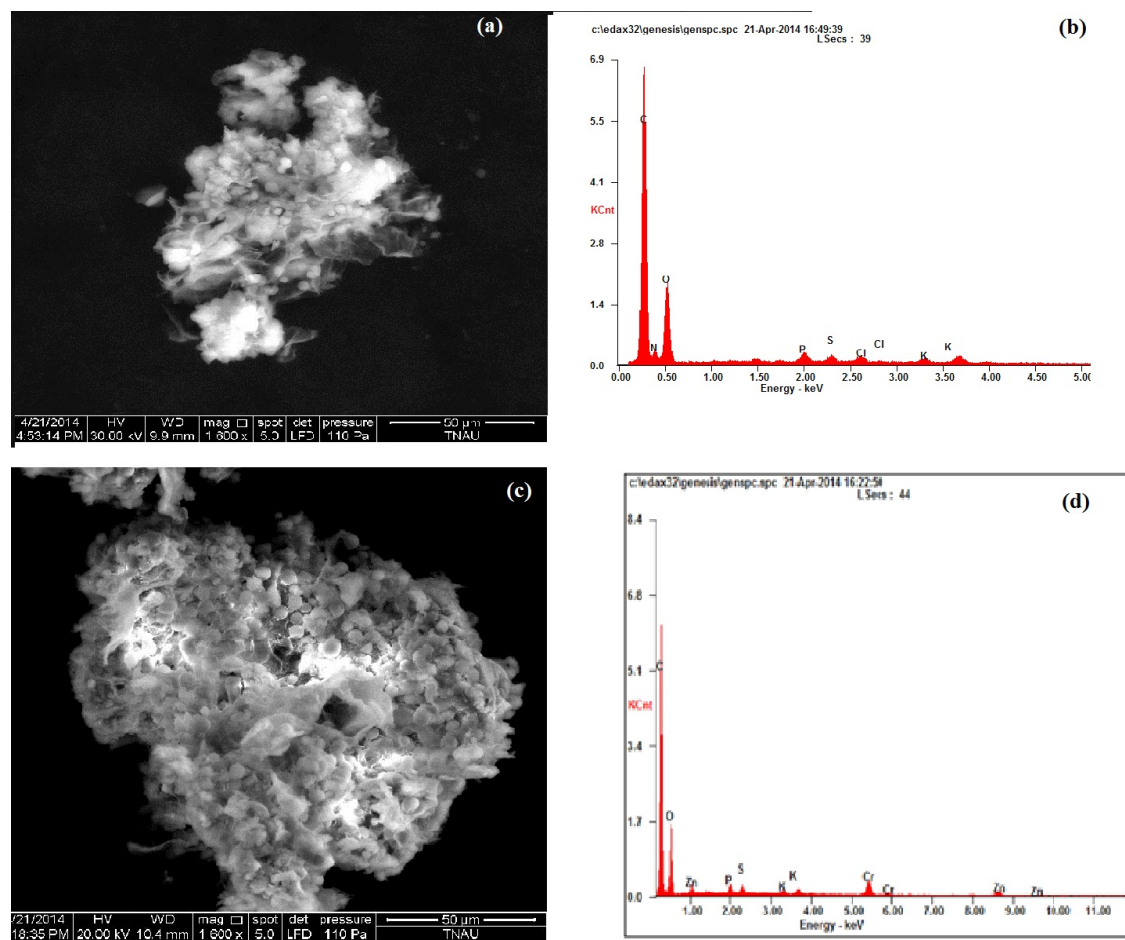

Figure S2 SEM and EDAX images of raw DPOC (a) and Cr(VI)/Zn(II) loaded DPOC

Table S1

| Properties              | Cr(VI) | Zn(II) |
|-------------------------|--------|--------|
| Atomic radii (pm)       | 140    | 134    |
| Vander Waals radii (pm) | 200    | 139    |
| Electro negativity (pm) | 1.66   | 1.65   |

Atomic properties of chromium and zinc ions
